Articles of interest in other COB journals

From *Journal of Cell Science*

**Efficient coupling of Sec23-Sec24 to Sec13-Sec31 drives COPII-dependent collagen secretion and is essential for normal craniofacial development**

**Anna K. Townley, Yi Feng, Katy Schmidt, Deborah A. Carter, Robert Porter, Paul Verkade and David J. Stephens**

Townley, A. K. et al. 2008. *J. Cell Sci.* doi: 10.1242/jcs.031070
